# Supplementary material for: Tumor evolution selectively inactivates the core microRNA machinery for immune evasion
Source: PubMed Central journal article supplement (PMC8636623; doi:10.1038/s41467-021-27331-3), 2021-12-01
Supplement: 41467_2021_27331_MOESM7_ESM.pdf [file 41467_2021_27331_MOESM7_ESM.pdf]

**Title:** Supplementary Data 1:

**Description:** sgRNA information and performance in the *in vivo* CRISPR screen using analysis of edgeR.

**Title:** Supplementary Data 2:

**Description:** sgRNA information and performance in the *in vitro* CRISPR screen using analysis of edgeR.

**Title:** Supplementary Data 3:

**Description:** Significant differentially expressed genes in *Ankrd52*-null MC38 cells after treatment with IFN $\gamma$  or not using analysis of edgeR.

**Title:** Supplementary Data 4:

**Description:** sgRNA sequences used in the research.

**Title:** Supplementary Data 5:

**Description:** qPCR primers used in the research.
